# Supplementary material for: Multiradiate calcium phosphate patterns derived from a gradating polysaccharide-acidic protein system
Source: Royal Society of Chemistry journal article supplement (doi:10.1039/b814095b), 2008-11-19
Supplement: b814095b.pdf [file b814095b.pdf]

Supplementary Material (ESI) for Chemical Communications  
This journal is © The Royal Society of Chemistry 2008

## Multiradiate Calcium Phosphate Patterns Derived from a Grading Polysaccharide-Acidic Protein System

Yi Shi,<sup>a</sup> Yahong Zhang,<sup>\*a</sup> Wuli Yang,<sup>\*b</sup> and Yi Tang<sup>a</sup>

<sup>a</sup> *Department of Chemistry, Shanghai Key Laboratory of Molecular Catalysis and Innovative Materials and Laboratory of Advanced Material, Fudan University, Shanghai 200433, P. R. China; Fax: 86-21-65641740; Tel: 86-21-55664125; E-mail address: zhangyh@fudan.edu.cn*

<sup>b</sup> *Key Laboratory of Molecular Engineering of Polymers (Ministry of Education) and Department of Macromolecular Science, Fudan University, Shanghai 200433, P. R. China; Fax: 86-21-65640293; Tel: 86-21-65642385; E-mail address: wlyang@fudan.edu.cn*

### 1. Experimental section

**Apparatus:** SEM images and EDS were performed using a Philips XL 30. The XRD patterns were attained with a Rigaku D/max-γB diffractometer obtained using CuKα radiation at 40 kV and 60 mA.

**Reagents:** Calcium acetate was obtained from Shanghai Qianjin reagent factory. Sodium dihydrogen phosphate was purchased from Shanghai Xinhua reagent factory. All solutions were prepared with deionized water. The chitosan (deacetylation degree: 70%) was purchased from Ji'nan Haidebei Marine Bioengineering Co., Ltd (Ji'nan, China), and the average molecular weights of chitosan were about 1100 kDa.

**Synthesis of poly-amino acid:** PAsp's with different hydroxyl contents (named as PAsp-x%OH) were prepared by adding polysuccinimide (PSI) with different hydroxylation degrees (named as PSI-x%OH, Mw = 10000) into an excess of NaOH solution and then stirring the mixture at room temperature for 3 h to open the residual pentacyclic ring on PSI-x%OH. The final solution of PAsp-x%OH was adjusted to pH = 7.0 and was diluted to a certain concentration for the further use. The PSI-x%OH was synthesized from aspartic acid according to the procedure published in ref. (*J. Macromol. Sci: Pure. Appl. Chem.*, 2003, **40**, 511.). A typical preparation procedure of PSI-x%OH is as follows: 2.0 g PSI was dissolved in 10mL of dimethylformamide (DMF), and then a definite ethanolamine solution was added at 0 °C during a period of 10 min. The reaction flask was moved to a water bath at 25 °C and stirred for another 8 h. The solution was then precipitated in 10-fold volume of methanol. The precipitate was washed with ethanol for three times and dried at 25 °C under a vacuum. By changing the ratio of PSI to ethanolamine, the PSI-x%OH with different hydroxyl content could be prepared.

**Preparation of calcium phosphate patterns:** Chitosan matrices were prepared by dip

coating their acetic aqueous solution (1% acetic acid and 1% chitosan) with glass substrates, and then drying in 60 °C. After quickly mixing 0.8 g of PAsp-x%OH (10 mg/mL) and 10 mL of calcium acetate solutions (10 mg/mL), several chitosan-glass substrates were then transferred into without stirring. Then 10 mL of sodium dihydrogen phosphate solution (10 mg/mL) was added in the mixture to get a homogeneous solution. This solution was then allowed to place at 18 °C for a period from several minutes to several hours. After reacting for a period of time, the samples were taken out and dried at room temperature for further use.

## 2. Figures of supporting information

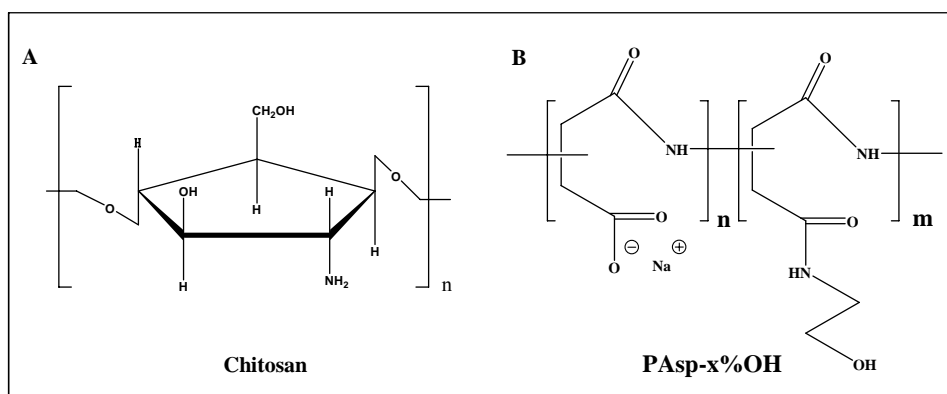

**Fig. S1** Structures of (A) chitosan and (B) polyaspartic acids with different hydroxyl contents (PAsp-x%OH,  $x = m/(m+n) \times 100\%$ ).

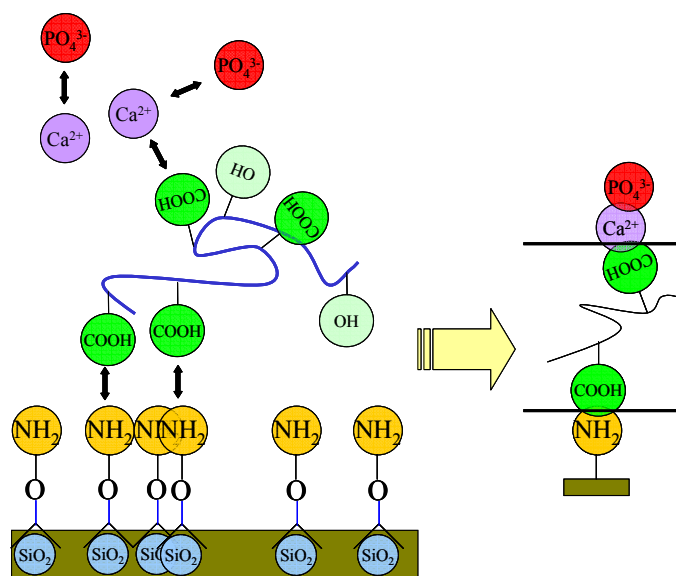

**Scheme S1** Schematic interaction among chitosan, PAsp-x%OH and calcium ions.

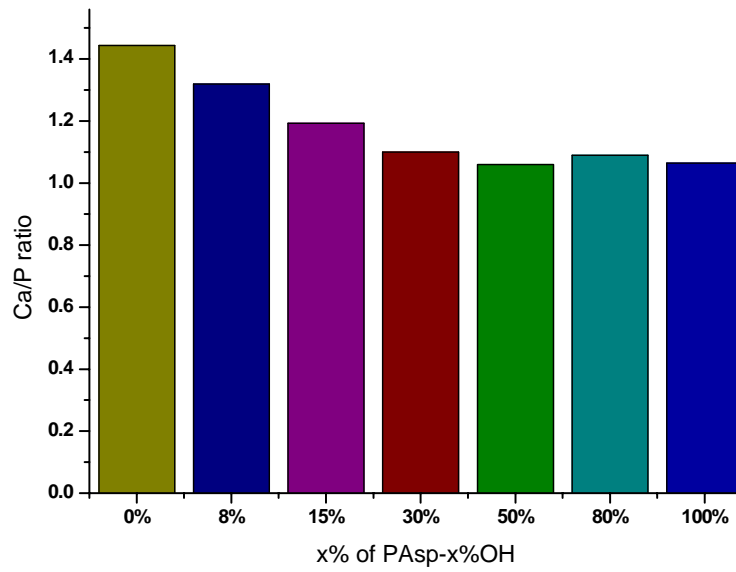

**Fig. S2** Ca/P ratios of the as-synthesized calcium phosphate materials for the reaction of 4 hours in the presence of PAsp-x%OH.

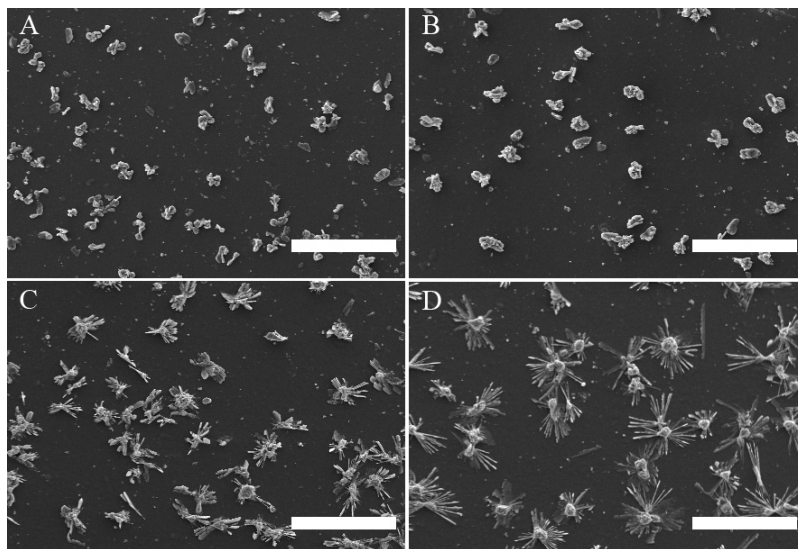

**Fig. S3.** Morphology transformation of samples within the initial reaction time of (A) 5 min, (B) 10 min, (C) 15 min, (D) 20 min in presence of PAsp-15%OH. The scale bar is 200  $\mu\text{m}$ .

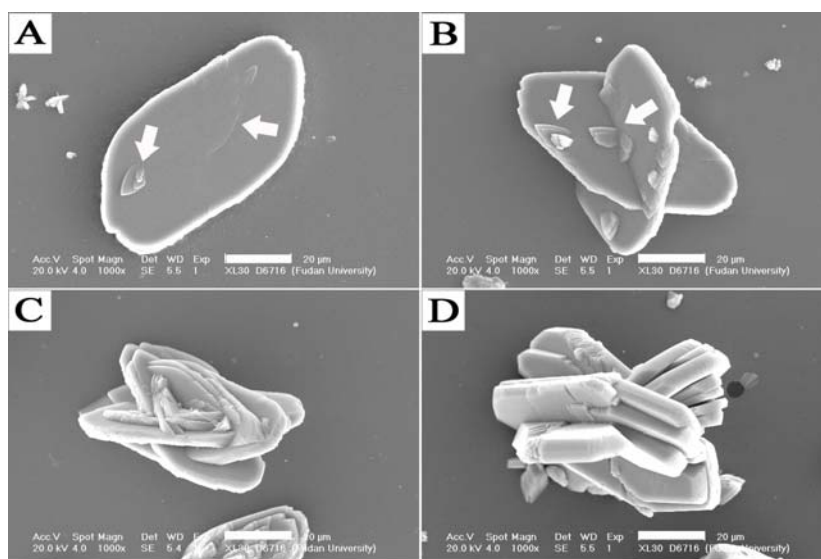

**Fig. S4** Morphology transformation of samples within the initial reaction time of (A) 5 min, (B) 10 min, (C) 15 min, (D) 20 min in presence of PAsp-100%OH. The scale bar is 20  $\mu\text{m}$ .

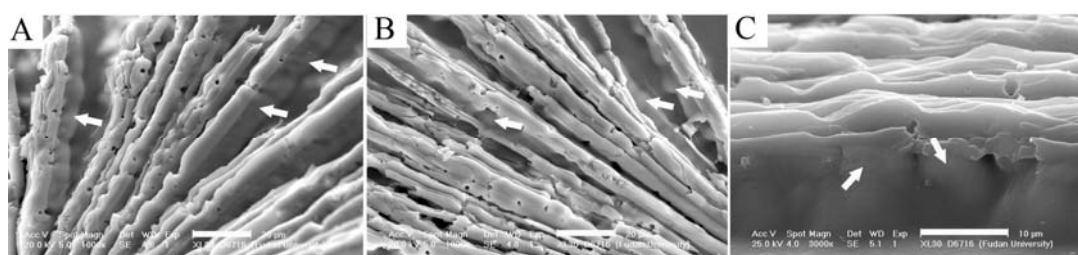

**Fig. S5** SEM images of calcium phosphate prepared by using PAsp-0 (A), 8 (B), 15 (C) %OH for the reaction of 4 hours. The white arrows mean the part of raised root of chins between inorganic mineral and organic chitosan matrix.
